# Supplementary material
Source: PubMed Central journal article supplement (PMC10717164)
Supplement: 12576_2016_444_MOESM1_ESM.pdf [file 12576_2016_444_MOESM1_ESM.pdf]

Supporting Information for

**The analysis of antioxidant expression during muscle atrophy induced by hind-limb suspension in mice**

**Tran-Non Nuoc<sup>1</sup> · Suhee Kim<sup>1,2</sup> · Sun-Hee Ahn<sup>2</sup> · Jin-Sil Lee<sup>2</sup> · Byung-Ju Park<sup>2</sup> · Tae-Hoon Lee<sup>1,2</sup>**

<sup>1</sup> Department of Molecular Medicine (BK21plus), Chonnam National University Graduate School, Gwangju, Republic of Korea

<sup>2</sup> Department of Oral Biochemistry, Dental Science Research Institute, Medical Research Center for Biom mineralization Disorders, School of Dentistry, Chonnam National University, Gwangju, Republic of Korea

**Corresponding author** Tae-Hoon Lee, Department of Oral Biochemistry, School of Dentistry, Chonnam National University, Gwangju 500-757, Republic of Korea, E-mail address: [thlee83@jnu.ac.kr](mailto:thlee83@jnu.ac.kr)

T. N. Nuoc and S. Kim contributed equally to this study.

**Authors' Contributions** S. Kim and T. H. Lee conceived the study and designed the experiments. T. N. Nuoc, S. Kim and J. S. Lee performed the experiments. T. N. Nuoc, S. Kim, S. H. Ahn, and B. J. Park analyzed the data, and T. N. Nuoc, S. Kim, and T. H. Lee wrote the manuscript.

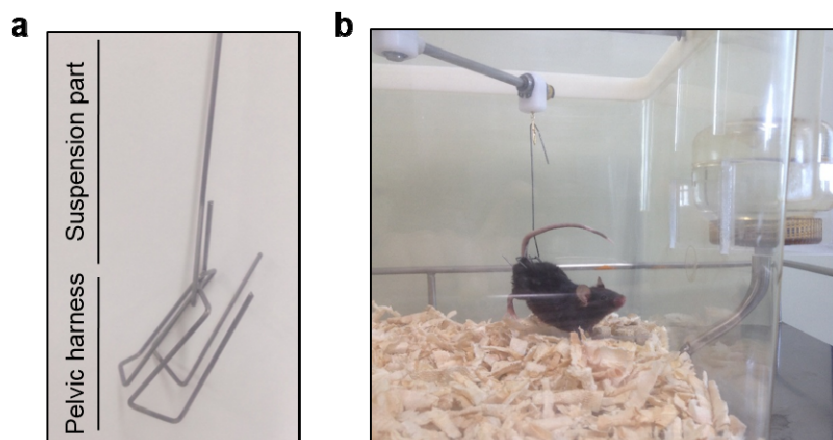

20

21 **Supplementary Fig. 1** Pelvic-HLS system in mouse. **a** HLS system was made of 2 separate thick insulated metal  
22 parts (suspension part and pelvic harness part). **b** Mice was fitted into pelvic harness part and then unloaded.

23

24 **Supplementary Table 1.** Gene list and primer sequences for real-time PCR

| Gene name | Direction | Sequence (from 5' to 3')     |
|-----------|-----------|------------------------------|
| GPX1      | F         | GGCCCCGACGGTGTTTC            |
|           | R         | CAGCAGGGTTTCTATGTCAGGTT      |
| GPX2      | F         | GCTGCCCTACCCTTATGATGAC       |
|           | R         | CAAAGTTCCAGGACACGTCTGA       |
| GPX3      | F         | CCAGCCTCCTTCTTCCTTCCT        |
|           | R         | CCATCGCGCTCACAGTTG           |
| GPX4      | F         | CGATATGCTGAGTGTGGTTTACG      |
|           | R         | CGGCTGCAAACCTCCTTGATT        |
| GPX5      | F         | CCATCTTCTCAGCACACTCTTCA      |
|           | R         | TACAGCTTCCCAGACACAAATCTACT   |
| GPX6      | F         | AACCAAACCAGTACCCAGTAAGAAA    |
|           | R         | ACATGCATTAGTAGGGACACAGGAA    |
| Prdx1     | F         | GAAACTCTTGACTCTACTCGTGCTTAAA |
|           | R         | CTATCCATCCCCAGCCCTGTA        |
| Prdx2     | F         | CAATGTGGATGACAGCAAGGA        |
|           | R         | TTCAGGCTCACCGATGTTTACC       |
| Prdx3     | F         | TGCTGTTGTCAATGGAGAGTTCA      |
|           | R         | CAAAGGGTAGAAGAAAAGCACCAA     |
| Prdx4     | F         | TTGGTTCAAGCCTTCCAGTACA       |
|           | R         | ATTATTGTTTCACTACCAGGTTTCCA   |
| Prdx5     | F         | TTATTGGATGATTCTTTGGTGTCTCT   |
|           | R         | CCTTCACTATGCCGTTGTCTATCAC    |
| Prdx6     | F         | CCTGATCAGAAAACCGTTGTC        |
|           | R         | AGGAAGCATGCCTGTGCAAT         |
| SOD1      | F         | TTTTTTTTCGCGGGTCCTTT         |
|           | R         | GACCAGAGAGAGCAAGACGAGAA      |
| SOD2      | F         | CCACACATTAACGCGCAGAT         |
|           | R         | TCGGTGGCGTTGAGATTGT          |
| SOD3      | F         | CCTTAGAGAGAGTATTTGGGAACCTTTA |
|           | R         | AAGCTGCAAAGTCTCAAAAAAGTACA   |
| Catalase  | F         | GAACGAGGAGGAGAGGAAACG        |
|           | R         | TTGACCGCTTTCTTCTGAATGA       |
| NDUFS3    | F         | GCTGGAGACAAGAAGCCTGAA        |
|           | R         | AGACAACCTTAGGTGAGGCCTTT      |
| NDUFS4    | F         | GGAGATTTGTATTTCTCGGTGTT      |
|           | R         | CTGAGCCTTATTTTTGGGAGCAT      |

| Gene name | Direction | Sequence (from 5' to 3')     |
|-----------|-----------|------------------------------|
| NDUFS5    | F         | GGGACCCGGGCGAAA              |
|           | R         | CATTCGCCTCATCGTTTTGTAC       |
| NDUFV1    | F         | GCTATCCGAGAGGCCTATGAAG       |
|           | R         | CCACGCACCACAAACACATC         |
| NDUFV2    | F         | TTTGCTTATCCACCTGTACATC       |
|           | R         | AGATAGTGGTCCTGTTGTTTTGACATA  |
| NOX1      | F         | TTTGACAGAGCCACTGACATCCT      |
|           | R         | GAAAACTCATTTGTCACATTGG       |
| NOX2      | F         | AGCTATGAGGTGGTGATGTTAGTGG    |
|           | R         | CACAATATTTGTACCAGACAGACTTGAG |
| NOX4      | F         | TGTTGGGCCTAGGATTGTGTT        |
|           | R         | AGGGACCTTCTGTGATCCTCG        |
| p22 phox  | F         | CCGTCTGCTTGGCCATTG           |
|           | R         | AACCTGTGGCCGCTCCTT           |
| p47phox   | F         | TGGTGGTTTTGCCAGATGAA         |
|           | R         | GCCTCGTCGGGACTGTCA           |
| p67 phox  | F         | TGCTCAAGGTGCATTACAAATACAC    |
|           | R         | CGAGAGCGCCAGCTTCTTAG         |
| Rac2      | F         | CCAGCCAAGTGAGGGTCTGA         |
|           | R         | GAGTGGACAGTCCCAAGAAG         |
| NOXO1     | F         | GGAAGTGGGAGGCAGTTCTG         |
|           | R         | TGAGGTCTCCAGCACATGGA         |
| GAPDH     | F         | TGTGTCCGTCGTGGATCTGA         |
|           | R         | GATGCCTGCTTCACCACCTT         |

25

26
